# Supplementary material for: Cobalt sulfides/dodecahedral porous carbon as anode materials for Na-ion batteries
Source: Royal Society of Chemistry journal article supplement (doi:10.1039/c5ra21589g), 2015-01-01
Supplement: c5ra21589g1.pdf [file c5ra21589g1.pdf]

## Electronic Supplementary Information

### **Cobalt sulfides/dodecahedral porous carbon as anode materials for Na-ion batteries**

Zhian Zhang<sup>a</sup>, Yongqing Gan<sup>a</sup>, Yanqing Lai<sup>a,\*</sup>, Xiaodong Shi<sup>a</sup>, Wei Chen<sup>a</sup>, Jie Li<sup>a</sup>

*School of Metallurgy and Environment, Central South University, Changsha Hunan*

*410083, China*

## Experiment details

### *Preparation of ZIF-67 nanocrystals.*

The ZIF-67 nanocrystals were prepared according to the previously reported methods with a little modification.<sup>1</sup> Typically, 5 mmol cobalt nitrate hexahydrate  $\text{Co}(\text{NO}_3)_2 \cdot 6\text{H}_2\text{O}$  and 20 mmol 2-methylimidazole were dissolved in 100 mL methanol, respectively. The latter clear organic solution was poured into the former pink  $\text{Co}^{2+}$  solution under strong magnetically stirring for 1 h to completely mix the component solutions. The homogeneous mixed solution aged at room temperature for 24 h, and then the pink precipitates were obtained. The pink ZIF-67 nanocrystals were collected by centrifugation, washed with ethanol several times, and finally dried at 60 °C overnight.

### *Synthesis of cs-CoS/DPC core-shell dodecahedron*

Typically, ZIF-67 and pure sulfur powder was mixed with a weight ratio of 2:1 by ground in agate mortar, and then transferred into a combustion boat. The boat was heated in Ar atmosphere from room temperature to 155 °C at the heating rate of 5 °C  $\text{min}^{-1}$  and maintained for 5 h, and then the temperature was elevated to 600 °C with a heating rate of 5 °C  $\text{min}^{-1}$  and maintained for another 5 h.

### *Materials Characterization*

X-ray diffraction patterns (XRD) were collected by a Rigaku3014 using graphite-monochromated Cu K $\alpha$  radiation. Field-emission scanning electron microscopy (SEM) images taken on a Nova NanoSEM 230 and transmission electron microscopy (TEM) images obtained by using a Tecnai G2 20ST were employed to

observe the morphology of the as-prepared samples. Raman spectra (Raman) were recorded on a Jobin-Yvon LabRAM HR-800 Raman spectrometer.

### *Electrochemical tests*

Electrochemical experiments were carried out by using CR-2032 type coin cells. To prepare the working electrode, the cs-CoS/DPC material was ground with pure Super P as conductive additive and carboxymethyl cellulose (CMC) as binder with a weight ratio of 7:2:1 in distilled water by using mortar. The resulting homogeneous slurry was casted onto pure Cu foil and then dried in a vacuum oven at 80 °C for 12 h. The dried electrodes were punched into round discs with a diameter of 1.0 cm and the mass loading of active materials cs-CoS/DPC on the electrode was 1.0-1.5 mg cm<sup>-2</sup>. The electrolyte employed in this work was 1 M NaClO<sub>4</sub> in a solvent mixture of ethylene carbonate/diethyl carbonate/fluoroethylene carbonate (EC/DEC/FEC, 1:1:0.1, v/v/v). The sodium metal and whatman glass fiber member (GF/D) were used as counter electrode and separator, respectively. The coin cells were assembled in an argon-filled glovebox (Universal 2440/750) in which oxygen and water contents were less than 1 ppm. Galvanostatic charge/discharge test were conducted with a battery test system. Electrochemical tests were carried out at room temperature. Cyclic voltammetry (CV) was tested at a scan rate of 0.1 mV s<sup>-1</sup> in the fixed voltage range of 0.01 V-3 V at room temperature.

1. R. Wu, D. P. Wang, X. Rui, B. Liu, K. Zhou, A. W. Law, Q. Yan, J. Wei and Z. Chen, *Advanced materials*, 2015, 27, 3038-3044.

**Figure S1**

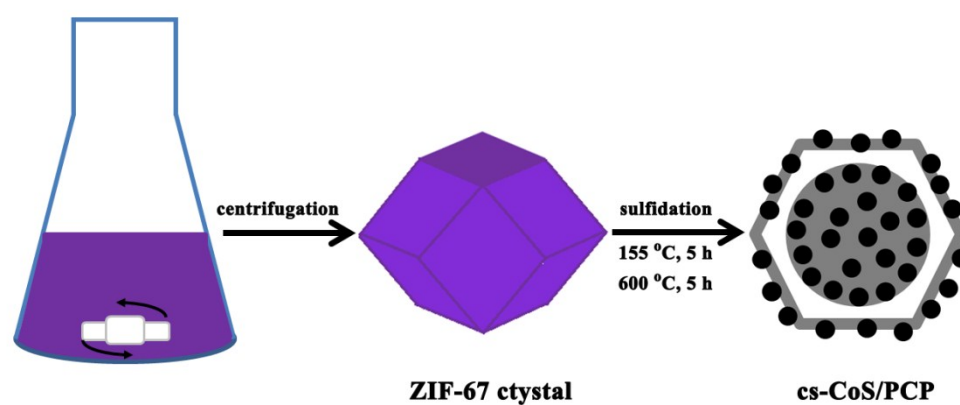

**Fig S1.** Schematic illustration for the synthesis of the 3D cs-CoS/DPC composite (the black dots represent the CoS particles, the grey part express the carbon core and shell matrix).

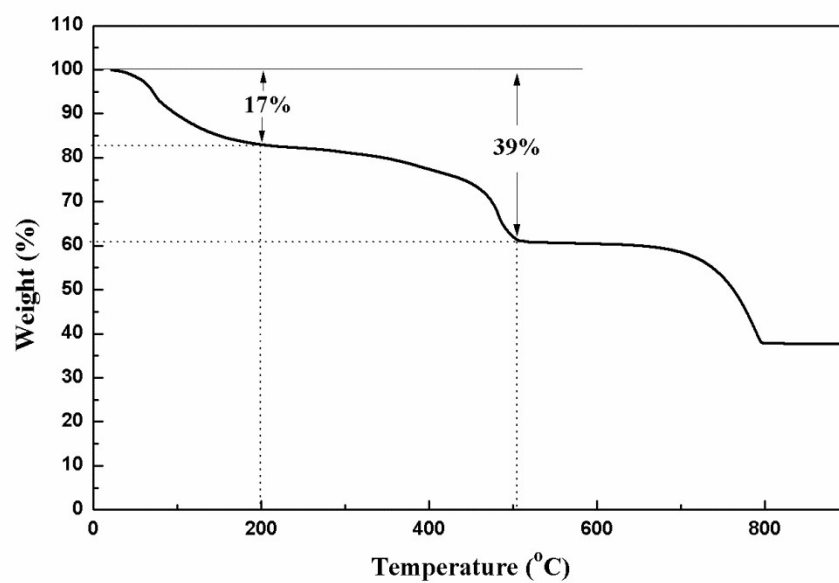

**Fig. S2** TGA curve of CoS/DPC composite under air atmosphere with a heating rate of 10 °C min<sup>-1</sup>

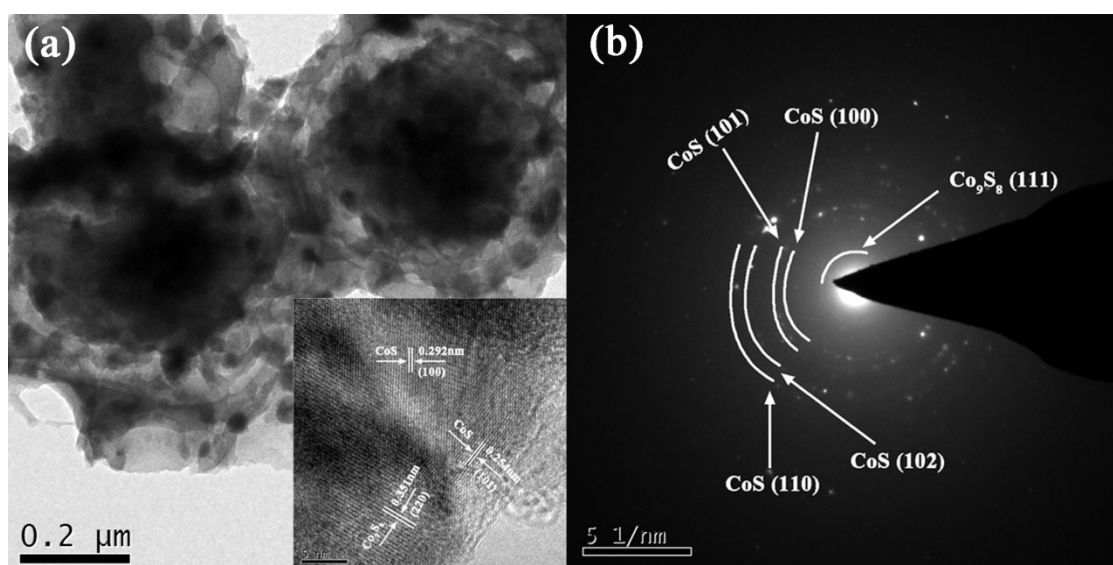

**Fig. S3** TEM image and corresponding SAED patterns of cs- $\text{Co}_x\text{S}_y/\text{DPC}$  (inset: HRTEM image)

**Table S1** Sodium storage properties of  $\text{Co}_x\text{S}_y/\text{C}$  reported recently

| Materials                                                                          | Discharge plateau voltage(V) | Initial discharge capacity ( $\text{mAh g}^{-1}$ ) | Electrochemical Performance ( $\text{mAh g}^{-1}$ )      | Reaction mechanism | Reference |
|------------------------------------------------------------------------------------|------------------------------|----------------------------------------------------|----------------------------------------------------------|--------------------|-----------|
| $\text{Co}_x\text{S}_y/\text{C}$                                                   | 0.8                          | 600                                                | 380 ( $50^{\text{th}}$ ) at $0.5 \text{ A g}^{-1}$       | Conversion         | This Work |
| $\text{Co}_3\text{S}_4\text{-PNS/GS}$                                              | 0.9                          | 890                                                | 329 ( $50^{\text{th}}$ ) at $0.5 \text{ A g}^{-1}$       | Insertion          | 1         |
| $\text{CoS}_2$                                                                     | 1.4                          | 790                                                | 194 ( $100^{\text{th}}$ ) at $0.1 \text{ A g}^{-1}$      | Conversion         | 2         |
| $\text{CoS}_2\text{-MWCNT}$                                                        | 1.4                          | 800                                                | 568 ( $100^{\text{th}}$ ) at $0.1 \text{ A g}^{-1}$      | Conversion         | 2         |
| bare $\text{Co}_{1-x}\text{S}$                                                     | 0.7                          | 673                                                | $\sim 10$ ( $50^{\text{th}}$ ) at $0.5 \text{ A g}^{-1}$ | Conversion         | 3         |
| $\text{Co}_9\text{S}_8/\text{C}$                                                   | 0.5                          | 689                                                | 404 ( $50^{\text{th}}$ ) at $0.5 \text{ A g}^{-1}$       | Conversion         | 3         |
| *PNS: porous nanosheets; GS: graphene sheets; MWCNT: multi walled carbon nanotubes |                              |                                                    |                                                          |                    |           |

## References

1. Y. Du, X. Zhu, X. Zhou, L. Hu, Z. Dai and J. Bao,  $\text{Co}_3\text{S}_4$  porous nanosheets embedded in graphene sheets as high-performance anode materials for lithium and sodium storage, *J. Mater. Chem. A*, 2015, **3**, 6787-6791.
2. Z. Shadike, M. H. Cao, F. Ding, L. Sang and Z. W. Fu, Improved electrochemical performance of  $\text{CoS}_2\text{-MWCNT}$  nanocomposites for sodium-ion batteries, *Chem. commun.*, 2015, **51**, 10486-10489.
3. Y. N. Ko and Y. C. Kang,  $\text{Co}_9\text{S}_8$ -carbon composite as anode materials with improved Na-storage performance, *Carbon*, 2015, **94**, 85-90.
